# Supplementary material for: The Ellis Island Effect: A novel mobile element in a multi-drug resistant Bacteroides fragilis clinical isolate includes a mosaic of resistance genes from Gram-positive bacteria
Source: PubMed Central journal article supplement — Mob Genet Elements. 2014 Jul 14;4:e29801. doi: 10.4161/mge.29801 (PMC4145004; doi:10.4161/mge.29801), 2014-07-14
Supplement: mge-4-e29801-s01.pdf [file mge-4-e29801-s01.pdf]

## Supplemental Material to:

Fasahath Husain, Yaligara Veeranagouda, Renata Boente,  
Kevin Tang, Gabriela Mulato, and Hannah M Wexler

The Ellis Island Effect: A novel mobile element in a multi-  
drug resistant *Bacteroides fragilis* clinical isolate includes a  
mosaic of resistance genes from Gram-positive bacteria

Mobile Genetic Elements 2013; 4; eLocation ID: e29801  
<http://dx.doi.org/10.4161/mge.29801>

<http://www.landesbioscience.com/journals/mge/article/29801>

| <b>Table S1: Primers used</b> |                             |                                |                            |                        |
|-------------------------------|-----------------------------|--------------------------------|----------------------------|------------------------|
| <b>Primers used</b>           | <b>Associated locus tag</b> | <b>Sequence (5'-3')</b>        | <b>Use</b>                 | <b>Position</b>        |
| 2377                          | BF638R_1255                 | TTTTCGTGTTGCTGTACCTGAAGAATGG   | Used in PCR and sequencing | For Left end of CTnHyb |
| 2378                          | BF615_00026-R               | CAAAGTCCTTGCGAAGAAGTCTTCTCCG   | Used in PCR                | For Left end of CTnHyb |
| 2376                          | BF638R_1258-F               | TGGAGACTATCGACGAAACACTGTGGC    | Used in PCR                | For Right end          |
| 2379                          | BF615_03037-R               | CTGACGGATTTCTGCATCCTTACCTACG   | Used in PCR                | For Right end          |
| 2392                          | 615_03040-41-F              | GCACGAATCATAATTGCCCTGTAGG      | Used in sequencing         | For Right end          |
| 2378                          | BF615_00026-R               | CAAAGTCCTTGCGAAGAAGTCTTCTCCG   | Used in PCR and sequencing | For the circle         |
| 2379                          | BF615_03037-R               | CTGACGGATTTCTGCATCCTTACCTACG   | Used in PCR                | For the circle         |
| 2384                          | 615_00015-F                 | GCTGGGGAGCGGACGCACTTGCGAGTGCCC | Used in PCR and sequencing | For popout 1           |
| 2385                          | 615_02927-R                 | GAAGATGCAGTAGCCGAGGATGAAACCCGC | Used in PCR                | For popout 1           |
| 2386                          | 615_02928-F                 | CCATCTCGAAAAGTCTTCTCGCGCATGGG  | Used in PCR and sequencing | For popout2            |
| 2387                          | 615_02946_R                 | CTCCAGTTCGGGTATCTGCGTCTCCGAGCC | Used in PCR                | For popout2            |

**Table S2: Genes contained in CTnHyb**

| Gene                            | Annotation <sup>1</sup>                                                      | Phyre2                      |      | RNA-seq<br>Count <sup>2</sup> | STD DEV      |
|---------------------------------|------------------------------------------------------------------------------|-----------------------------|------|-------------------------------|--------------|
| Locus Tag (NCBI<br>designation) |                                                                              | Confidence,<br>Coverage (%) |      |                               |              |
| <b>HMPREF1204_00027</b>         | <b>Chaperone protein DnaK</b>                                                |                             |      | <b>6578.5</b>                 | <b>924.2</b> |
| HMPREF1204_00026                | putative transposase                                                         |                             |      | 3.5                           | 0.7          |
| HMPREF1204_00025                | tyrosine type site-specific recombinase                                      |                             |      | 21                            | 8.5          |
| HMPREF1204_00024                | transferase (monofunctional glycosyltransferase)                             | 60                          | , 43 | 1                             | 1.4          |
| HMPREF1204_00023                | transferase (monofunctional glycosyltransferase)                             | 99                          | , 40 | 1.5                           | 0.7          |
| HMPREF1204_00022                | putative excisionase                                                         |                             |      | 0                             | 0.0          |
| HMPREF1204_00021                | P-loop containing nucleoside triphosphate hydrolases                         | 100                         | , 64 | 26.5                          | 6.4          |
| HMPREF1204_00020                | DNA primase (EC 2.7.7.-)                                                     |                             |      | 76                            | 8.5          |
| HMPREF1204_00019                | DNA/RNA-binding 3-helical bundle                                             | 98                          | , 24 | 93                            | 9.9          |
| HMPREF1204_00018                | transferase (lincosamide resistance protein)                                 | 95                          | , 23 | 73                            | 7.1          |
| HMPREF1204_00017                | Ser/Thr protein phosphatase family protein                                   |                             |      | 64                            | 12.7         |
| HMPREF1204_00016                | Four-helical up-and-down bundle                                              | 10                          | , 18 | 4                             | 0.0          |
| HMPREF1204_00015                | virus                                                                        | 46                          | , 26 | 4                             | 2.8          |
| <b>HMPREF1204_00014</b>         | <b>Conjugative transposon protein TraE</b>                                   |                             |      | <b>9</b>                      | <b>1.4</b>   |
| HMPREF1204_00013                | transport protein                                                            | 28                          | , 60 | 1.5                           | 0.7          |
| HMPREF1204_00012                | integrase                                                                    |                             |      | 64.5                          | 4.9          |
| HMPREF1204_00011                | integrase                                                                    |                             |      | 22                            | 8.5          |
| HMPREF1204_00010                | excisionase family DNA binding domain-containing protein                     |                             |      | 0.5                           | 0.7          |
| HMPREF1204_00009                | protein transport                                                            | 41                          | , 17 | 3                             | 4.2          |
| HMPREF1204_00008                | Integrase IntN1                                                              |                             |      | 9.5                           | 3.5          |
| HMPREF1204_00007                | DNA/RNA-binding 3-helical bundle                                             | 96                          | , 17 | 12.5                          | 0.7          |
| HMPREF1204_00006                | dna-binding protein                                                          | 98                          | , 36 | 4                             | 1.4          |
| HMPREF1204_00005                | hydrolase (mobilization protein A)                                           | 98                          | , 29 | 46                            | 11.3         |
| HMPREF1204_00004                | membrane protein                                                             | 52                          | , 72 | 122                           | 2.8          |
| HMPREF1204_00003                | Maltose O-acetyltransferase (EC 2.3.1.79)                                    |                             |      | 2062                          | 175.4        |
| <b>HMPREF1204_00002</b>         | <b>Pyridoxamine; FMN-binding; nimJ (metronidazole<br/>resistance)</b>        |                             |      | <b>2979.5</b>                 | <b>306.2</b> |
| HMPREF1204_0001                 | transposase                                                                  |                             |      | 51.5                          | 7.8          |
| HMPREF1204_02924                | DNA-cytosine methyltransferase (EC 2.1.1.37)                                 |                             |      | 35.5                          | 13.4         |
| HMPREF1204_02925                | dna-binding protein (excisionase from transposon tn916)                      | 27                          | , 11 | 12.5                          | 0.7          |
| HMPREF1204_02926                | dna-binding protein                                                          | 100                         | , 87 | 41                            | 2.8          |
| HMPREF1204_02927                | transmembrane protein (colicin ia)                                           | 12                          | , 39 | 9.5                           | 0.7          |
| <b>HMPREF1204_02928</b>         | <b>Conjugative transposon protein TraG</b>                                   |                             |      | <b>12.5</b>                   | <b>4.9</b>   |
| HMPREF1204_02929                | excisionase family DNA binding domain-containing protein                     |                             |      | 11                            | 2.8          |
| HMPREF1204_02930                | mobilizable transposon, int protein                                          |                             |      | 22                            | 8.5          |
| HMPREF1204_02931                | excisionase                                                                  |                             |      | 2                             | 1.4          |
| HMPREF1204_02932                | transcriptional regulator                                                    | 97                          | , 17 | 11.5                          | 2.1          |
| HMPREF1204_02933                | dna-binding protein                                                          | 97                          | , 38 | 1.5                           | 0.7          |
| HMPREF1204_02934                | conserved hypothetical protein with relaxase/mobilization<br>nuclease domain |                             |      | 4.5                           | 2.1          |

|                         |                                                                          |            |            |              |              |
|-------------------------|--------------------------------------------------------------------------|------------|------------|--------------|--------------|
| HMPREF1204_02935        | protein binding                                                          | 78         | 65         | 1            | 0.0          |
| HMPREF1204_02936        | protein transport (synaptosomal-associated protein 23)                   | 45         | 18         | 0.5          | 0.7          |
| HMPREF1204_02937        | recombination                                                            | 100        | 93         | 25.5         | 6.4          |
| HMPREF1204_02938        | dna binding protein                                                      | 100        | 58         | 26           | 1.4          |
| HMPREF1204_02939        | hydrolase                                                                | 100        | 37         | 72.5         | 4.9          |
| HMPREF1204_02940        | hydrolase                                                                | 67         | 6          | 138          | 11.3         |
| HMPREF1204_02941        | DNA-binding domain of Mlu1-box binding protein MBP1                      | 98         | 31         | 68           | 12.7         |
| HMPREF1204_02942        | 5-methylcytosine-specific restriction related enzyme                     |            |            | 154          | 33.9         |
| HMPREF1204_02943        | Modification methylase HgaIA (Cytosine-specific methyltransferase HgaIA) |            |            | 68           | 5.7          |
| HMPREF1204_02944        | Modification methylase HgaIA (Cytosine-specific methyltransferase HgaIA) |            |            | 84.5         | 3.5          |
| HMPREF1204_02945        | dna binding protein                                                      | 100        | 86         | 43.5         | 14.8         |
| <b>HMPREF1204_02946</b> | <b>Conjugative transposon protein TraG</b>                               |            |            | <b>5</b>     | <b>1.4</b>   |
| HMPREF1204_02947        | hypothetical protein                                                     |            |            | 15.5         | 0.7          |
| HMPREF1204_02948        | alpha-Amylase inhibitor tendamistat                                      | 39         | 5          | 3            | 4.2          |
| HMPREF1204_02949        | transcription                                                            | 36         | 41         | 3.5          | 2.1          |
| HMPREF1204_02950        | putative antirepressor                                                   |            |            | 5.5          | 0.7          |
| HMPREF1204_02951        | ribosome                                                                 | 40         | 14         | 0.5          | 0.7          |
| HMPREF1204_02952        | ribosome                                                                 | 20         | 8          | 7.5          | 0.7          |
| HMPREF1204_02953        | ribosome                                                                 | 28         | 14         | 3            | 0.0          |
| <b>HMPREF1204_02954</b> | <b>Conjugative transposon protein TraK</b>                               |            |            | <b>3.5</b>   | <b>2.1</b>   |
| HMPREF1204_02955        | Mitochondrial import receptor subunit Tom20                              | 44         | 29         | 3.5          | 2.1          |
| <b>HMPREF1204_02956</b> | <b>Conjugative transposon protein TraM</b>                               |            |            | <b>13</b>    | <b>1.4</b>   |
| <b>HMPREF1204_02957</b> | <b>Conjugative transposon protein TraN</b>                               |            |            | <b>17</b>    | <b>4.2</b>   |
| HMPREF1204_02958        | transferase                                                              | 59         | 12         | 5.5          | 0.7          |
| HMPREF1204_02959        | structural genomics, unknown function                                    | 100        | 87         | 14.5         | 3.5          |
| HMPREF1204_02960        | structural genomics, unknown function                                    | 100        | 78         | 19.5         | 6.4          |
| HMPREF1204_02961        | Putative mobilization protein BF0133                                     |            |            | 32.5         | 2.1          |
| HMPREF1204_02962        | lysozyme - like/ phage lysozyme family                                   | 100        | 91         | 2            | 0.0          |
| HMPREF1204_02963        | Integrase                                                                | 100        | 80         | 6            | 2.8          |
| <b>HMPREF1204_02964</b> | <b>transposase</b>                                                       |            |            | <b>332</b>   | <b>36.8</b>  |
| <b>HMPREF1204_02965</b> | <b>Macrolide-efflux protein, mefA</b>                                    |            |            | <b>666.5</b> | <b>103.9</b> |
| HMPREF1204_02966        | signaling protein                                                        | 5          | 43         | 74           | 14.1         |
| HMPREF1204_02967        | hydrolase                                                                | 32         | 17         | 236          | 9.9          |
| HMPREF1204_02968        | Transcriptional regulator, MerR family                                   |            |            | 8.5          | 2.1          |
| <b>HMPREF1204_02969</b> | <b>APH phosphotransferases (kanamycin resistance)</b>                    | <b>100</b> | <b>100</b> | <b>38</b>    | <b>9.9</b>   |
| HMPREF1204_02970        | transcriptional regulator, putative                                      |            |            | 3            | 2.8          |
| HMPREF1204_02971        | DNA/RNA-binding 3-helical bundle                                         | 100        | 75         | 21           | 4.2          |
| HMPREF1204_02972        | ABC transporter, ATP-binding protein                                     |            |            | 2.5          | 2.1          |
| HMPREF1204_02973        | membrane protein, putative                                               |            |            | 4            | 1.4          |
| HMPREF1204_02974        | hydrolase/ mobilization protein a                                        | 99         | 34         | 22           | 4.2          |
| HMPREF1204_02975        | Adenylate cyclase                                                        |            |            | 17.5         | 6.4          |
| HMPREF1204_02976        | transcription regulator                                                  | 99         | 42         | 69.5         | 2.1          |
| HMPREF1204_02977        | dna binding protein /dna / integrase                                     | 100        | 74         | 67.5         | 4.9          |
| HMPREF1204_02978        | Spectinomycin 9-O-adenylyltransferase                                    |            |            | 3            | 1.4          |
| HMPREF1204_02979        | transferase/ kanamycin nucleotidyltransferase                            | 96         | 54         | 0.5          | 0.7          |
| HMPREF1204_02980        | Ubiquinone/menaquinone biosynthesis methyltransferase                    |            |            | 3            | 1.4          |
| HMPREF1204_02981        | HD superfamily hydrolase                                                 |            |            | 2            | 1.4          |
| HMPREF1204_02982        | transposase                                                              |            |            | 607          | 21.2         |

|                         |                                                                                 |     |    |              |              |
|-------------------------|---------------------------------------------------------------------------------|-----|----|--------------|--------------|
| <b>HMPREF1204_02983</b> | <b>GTP-binding protein TypA/BipA (tetracycline resistance)</b>                  |     |    | <b>607.5</b> | <b>29.0</b>  |
| HMPREF1204_02984        | Undecaprenyl-phosphate N-acetylglucosaminyl 1-phosphate transferase (rteA like) |     |    | 53           | 4.2          |
| <b>HMPREF1204_02985</b> | <b>multidrug efflux protein</b>                                                 |     |    | <b>296</b>   | <b>76.4</b>  |
| <b>HMPREF1204_02986</b> | <b>RND efflux system, inner membrane transporter CmeB</b>                       |     |    | <b>639</b>   | <b>151.3</b> |
| <b>HMPREF1204_02987</b> | <b>outer membrane protein oprM precursor</b>                                    |     |    | <b>178</b>   | <b>31.1</b>  |
| HMPREF1204_02988        | Glucosamine--fructose-6-phosphate aminotransferase                              |     |    | 38.5         | 4.9          |
| HMPREF1204_02989        | Magnesium transport protein CorA, transmembrane region                          | 47  | 61 | 2            | 1.4          |
| HMPREF1204_02990        | gene regulation (zinc peptidase site)                                           | 100 | 40 | 1012.5       | 137.9        |
| HMPREF1204_02991        | Bacillus chorismate mutase-like/ L30e-like                                      | 66  | 37 | 208          | 8.5          |
| HMPREF1204_02992        | Cell wall endopeptidase, family M23/M37                                         |     |    | 16.5         | 4.9          |
| HMPREF1204_02993        | structural genomics, unknown function                                           | 61  | 24 | 15           | 1.4          |
| HMPREF1204_02994        | PEP carboxykinase N-terminal domain                                             | 80  | 68 | 1            | 0.0          |
| HMPREF1204_02995        | lyase                                                                           | 73  | 15 | 26           | 8.5          |
| HMPREF1204_02996        | transferase/ dna primase                                                        | 100 | 89 | 10.5         | 0.7          |
| HMPREF1204_02997        | PH domain-like barrel                                                           | 95  | 48 | 2.5          | 2.1          |
| HMPREF1204_02998        | Spectrin repeat-like/ PhoU-like                                                 | 73  | 70 | 3.5          | 0.7          |
| HMPREF1204_02999        | viral protein/ fusion glycoprotein                                              | 43  | 48 | 3.5          | 3.5          |
| HMPREF1204_03000        | antimicrobial protein/ plnj                                                     | 38  | 6  | 1.5          | 0.7          |
| HMPREF1204_03001        | putative cell wall endopeptidase family protein                                 |     |    | 8.5          | 0.7          |
| HMPREF1204_03002        | 4-helical cytokines                                                             | 63  | 11 | 16           | 4.2          |
| HMPREF1204_03003        | DNA mismatch repair protein MutS                                                |     |    | 23.5         | 9.2          |
| <b>HMPREF1204_03004</b> | <b>putative hemagglutinin</b>                                                   |     |    | <b>13.5</b>  | <b>6.4</b>   |
| HMPREF1204_03005        | transferase                                                                     | 17  | 18 | 0.5          | 0.7          |
| HMPREF1204_03006        | dna binding protein                                                             | 99  | 87 | 8            | 2.8          |
| HMPREF1204_03007        | hydrolase/ probable dipeptidyl-peptidase 3                                      | 97  | 11 | 16           | 1.4          |
| HMPREF1204_03008        | structural genomics, unknown function                                           | 37  | 11 | 0            | 0.0          |
| HMPREF1204_03009        | Ribosomal protein S5 domain 2-like                                              | 17  | 22 | 1            | 1.4          |
| HMPREF1204_03010        | ATPase                                                                          |     |    | 70.5         | 0.7          |
| HMPREF1204_03011        | membrane protein                                                                | 100 | 29 | 9            | 0.0          |
| HMPREF1204_03012        | transmembrane protein                                                           | 98  | 76 | 7.5          | 0.7          |
| HMPREF1204_03013        | transcription, dna/ putative marr-family transcriptional repressor              | 94  | 31 | 2.5          | 2.1          |
| HMPREF1204_03014        | MHC antigen-recognition domain                                                  | 36  | 20 | 1.5          | 0.7          |
| HMPREF1204_03015        | transcription regulator                                                         | 42  | 20 | 3.5          | 2.1          |
| HMPREF1204_03016        | oxidoreductase (aldehyde(d)-nad(a))                                             | 41  | 47 | 2            | 2.8          |
| HMPREF1204_03017        | replication                                                                     | 48  | 14 | 17.5         | 0.7          |
| HMPREF1204_03018        | Serine type site-specific recombinase                                           |     |    | 79           | 22.6         |
| HMPREF1204_03019        | hydrolase                                                                       | 59  | 46 | 34.5         | 2.1          |
| HMPREF1204_03020        | Class II aaRS and biotin synthetases                                            | 30  | 34 | 41.5         | 16.3         |
| <b>HMPREF1204_03021</b> | <b>Thioredoxin</b>                                                              |     |    | <b>13</b>    | <b>8.5</b>   |
| HMPREF1204_03022        | cell cycle                                                                      | 94  | 62 | 18.5         | 7.8          |
| HMPREF1204_03023        | lyase/ fructose-bisphosphate aldolase class 1                                   | 50  | 51 | 9.5          | 4.9          |
| HMPREF1204_03024        | structural genomics, unknown function                                           | 81  | 18 | 12           | 4.2          |
| HMPREF1204_03025        | DNA/RNA-binding 3-helical bundle                                                | 51  | 50 | 3            | 1.4          |
| HMPREF1204_03026        | oxireductase/ thioredoxin h-type                                                | 43  | 41 | 5            | 1.4          |
| HMPREF1204_03027        | DNA/RNA-binding 3-helical bundle / "Winged helix" DNA-binding domain            | 97  | 95 | 5.5          | 3.5          |
| HMPREF1204_03028        | dna-binding protein                                                             | 54  | 70 | 1.5          | 0.7          |
| HMPREF1204_03029        | MCP/YpsA-like                                                                   | 100 | 94 | 6.5          | 0.7          |

|                  |                                                                                           |    |    |     |     |
|------------------|-------------------------------------------------------------------------------------------|----|----|-----|-----|
| HMPREF1204_03030 | putative ribose phosphate pyrophosphokinase                                               |    |    | 1   | 1.4 |
| HMPREF1204_03031 | <b>dna-binding protein</b>                                                                | 96 | 46 | 1.5 | 0.7 |
| HMPREF1204_03032 | Chromosome (plasmid) partitioning protein ParA / Sporulation initiation inhibitor protein |    |    | 3   | 0.0 |
| HMPREF1204_03033 | Single-stranded DNA-binding protein                                                       |    |    | 1.5 | 0.7 |
| HMPREF1204_03034 | <b>viral protein/ superfamily gp37</b>                                                    | 99 | 58 | 0.5 | 0.7 |
| HMPREF1204_03035 | <b>beta-Prism II / alpha-D-mannose-specific plant lectins</b>                             | 33 | 8  | 0.5 | 0.7 |
| HMPREF1204_03036 | <b>metal binding protein (archaeal protein sso6904)</b>                                   | 19 | 23 | 1.5 | 2.1 |
| HMPREF1204_03037 | Single-stranded DNA-binding protein                                                       |    |    | 0   | 0.0 |
| HMPREF1204_03038 | <b>virus (capsid protein gamma)</b>                                                       | 8  | 20 | 1.5 | 2.1 |
| HMPREF1204_03039 | <b>SH3-like barrel</b>                                                                    | 61 | 68 | 1.5 | 0.7 |
| HMPREF1204_03040 | <b>viral protein (upper collar protein)</b>                                               | 59 | 23 | 5   | 2.8 |

<sup>1</sup>Annotation in black is from the RAST server and in red from the Phyre2 fold recognition server. If the annotation is derived from Phyre2, the percent confidence and percent coverage are listed to the right.

<sup>2</sup>Average of two biological replicates
